# Supplementary material
Source: Springer Nature journal article supplement (https://www.springermedizin.de/resource/supplementary/12916_2012_563_MOESM1_ESM.pdf/9598158)
Supplement: MOESM1 [file 9598158]

Literature Search (June 2011):  
Embase, SPORTDiscus, Google Scholar, PubMed, ISI Web  
of Knowledge, Scirus and PEDro

766 articles

Duplicates were excluded, relevant titles and abstracts were  
selected yielding 15 articles

Applied inclusion/exclusion criteria left nine articles

A modified version of the nine item van Tulder et al<sup>10</sup> was  
used to assess the studies.
